# Supplementary material for: Motor dexterity and strength depend upon integrity of the attention-control system
Source: PubMed Central journal article supplement — Proc Natl Acad Sci U S A. 2017 Dec 28;115(3):E536–45. doi: 10.1073/pnas.1715617115 (PMC5776987; doi:10.1073/pnas.1715617115), 2017-12-28

## Supplementary Information

**Table S1: Subject characteristics (Tracking and Force experiments / Lesion-anatomy study)**

|                                                | Controls        |                 | R-hand weak†                   |                 | L-hand weak†                   |                             | 3 groups          |       | R vs L-weak       |                 |
|------------------------------------------------|-----------------|-----------------|--------------------------------|-----------------|--------------------------------|-----------------------------|-------------------|-------|-------------------|-----------------|
|                                                |                 |                 |                                |                 |                                |                             | Chi <sup>2</sup>  | p     | Chi <sup>2</sup>  | P <sup>*3</sup> |
| N                                              | 49              |                 | 50                             |                 | 42                             |                             |                   |       |                   |                 |
| Age / yrs                                      | 56 (45 - 70)    |                 | 57 (45-65)                     |                 | 63 (55-69)                     |                             | 4.46              | 0.107 | 4.30              | 0.038           |
| Males / %                                      | 59              |                 | 62                             |                 | 69                             |                             | 0.99              | 0.610 | 0.50              | 0.480           |
| Handedness (EHI)                               | 90 (89 - 100)   |                 | 100 (90 - 100)                 |                 | 100 (90 - 100)                 |                             | 3.18              | 0.204 | 0.52              | 0.470           |
| NIHSS – overall /42                            | 0               |                 | 5 (3 - 6)* <sup>1</sup>        |                 | 4 (3 - 5)* <sup>1</sup>        |                             | 101               | 0.000 | 0.34              | 0.563           |
| HADS – Depression /15                          | 2 (2 -3)        |                 | 3 (2 - 4)* <sup>1</sup>        |                 | 3 (2 - 5)* <sup>1</sup>        |                             | 12.3              | 0.002 | 0.12              | 0.731           |
| HADS – Anxiety /15                             | 2 (2 - 3)       |                 | 3 (2 - 4)                      |                 | 3 (2 - 4)                      |                             | 0.19              | 0.908 | 0.01              | 0.911           |
| Lesion volume /cc.                             | 0               |                 | 5.6 (2.6 – 14.3)* <sup>1</sup> |                 | 8.1 (3.8 – 20.1)* <sup>1</sup> |                             | 100               | 0.000 | 2.16              | 0.142           |
| White Matter Score /3                          | 1 (1 – 1)       |                 | 1 (1 - 1)                      |                 | 1 (1 - 2)                      |                             | 2.33              | 0.312 | 1.73              | 0.188           |
| Days from stroke onset                         | -               |                 | 5 (4 – 7)                      |                 | 6 (4 – 8)                      |                             | -                 | -     | 0.70              | 0.403           |
| Arm specific tests:                            |                 |                 |                                |                 |                                |                             |                   |       |                   |                 |
| Hand use                                       | Right           | Left            | Right                          | Left            | Right                          | Left                        | pooling weak arms |       | R- vs L-weak arms |                 |
| NIHSS – arm motor /4 (0: normal)               | 0               | 0               | 2* <sup>2</sup><br>(1 - 2)     | 0               | 0                              | 2* <sup>2</sup><br>(1 - 2)  | 91.9              | 0.000 | 0.19              | 0.663           |
| Short Fugl Meyer arm function /12 (12: normal) | 12              | 12              | 9* <sup>2</sup><br>(8 - 12)    | 12              | 12                             | 8* <sup>2</sup><br>(7 - 10) | 71.9              | 0.000 | 2.92              | 0.087           |
| Grip force /% (100% ≡ ≥100N)                   | 100<br>(99-100) | 100<br>(99-100) | 96* <sup>2</sup><br>(88-100)   | 100<br>(97-100) | 99<br>(97-100)                 | 93* <sup>2</sup><br>(70-99) | 36.6              | 0.000 | 1.78              | 0.183           |

† “weak” here refers to clinically-apparent impairment in hand strength and/or dexterity. Note that patients can have impaired dexterity while having normal grip force in the same hand. Cited values are median (interquartile range). All tests non-parametric (Kruskal-Wallis, rank sum or chi2-tests where appropriate). \*<sup>1</sup> p<0.01, all patients vs controls. \*<sup>2</sup> p<0.01 paretic-arm vs equivalent arm in controls (e.g. L arm in L-hand weak group vs. L arm in controls). Comparisons of paretic arms of R- vs.L-weak\*<sup>3</sup> were insignificant except age. N patients with lesions in attention-control regions and/or frontoparietal cortices but not CST/M1: 15. N patients with lesions where overlap of attention-control regions > overlap of CST/M1: 36. EHI: Edinburgh Handedness Inventory; HADS: Hospital Anxiety-Depression Scale; NIHSS: National Institute Health Stroke Scale.

**Table S2: Subject characteristics (Precision and Force experiments)**

|                                                |                 |                |                             |                |                              |                              | <b>3 groups</b>        |          | <b>R vs L-weak</b>     |                       |
|------------------------------------------------|-----------------|----------------|-----------------------------|----------------|------------------------------|------------------------------|------------------------|----------|------------------------|-----------------------|
|                                                | <b>Controls</b> |                | <b>R-hand weak†</b>         |                | <b>L-hand weak†</b>          |                              | <b>Chi<sup>2</sup></b> | <b>p</b> | <b>Chi<sup>2</sup></b> | <b>P*<sup>3</sup></b> |
| N                                              | 10              |                | 13                          |                | 14                           |                              |                        |          |                        |                       |
| Age / yrs                                      | 68 (52 - 74)    |                | 58 (50 - 70)                |                | 68 (49 - 82)                 |                              | 1.60                   | 0.448    | 1.14                   | 0.285                 |
| Males / %                                      | 60              |                | 85                          |                | 57                           |                              | 2.68                   | 0.262    | 2.44                   | 0.118                 |
| Handedness (EHI)                               | 90 (90 - 90)    |                | 90 (90 - 100)               |                | 90 (80 - 100)                |                              | 1.71                   | 0.426    | 0.04                   | 0.836                 |
| NIHSS – overall /42                            | 0               |                | 4 (3 - 5)                   |                | 4 (4 - 5) * <sup>1</sup>     |                              | 22.3                   | 0.000    | 0.33                   | 0.568                 |
| HADS – Depression /15                          | 2 (1 - 3)       |                | 3 (2 - 6)                   |                | 4 (2 - 5)* <sup>1</sup>      |                              | 6.47                   | 0.039    | 0.00                   | 1.000                 |
| HADS – Anxiety /15                             | 3 (2 - 4)       |                | 2 (2 - 5)                   |                | 3 (2 - 4)                    |                              | 0.01                   | 0.994    | 0.02                   | 0.902                 |
| Lesion volume /cc.                             | 0               |                | 3.0 (1.0 – 3.9)             |                | 4.2 (1.0 - 15)* <sup>1</sup> |                              | 22.9                   | 0.000    | 1.99                   | 0.158                 |
| White Matter Score /3                          | 1 (1 - 2)       |                | 1 (1 - 2)                   |                | 1 (1 - 2)                    |                              | 0.69                   | 0.708    | 0.28                   | 0.595                 |
| Days from stroke onset                         | -               |                | 4 (3 – 6)                   |                | 5 (3 – 6)                    |                              | -                      | -        | 0.04                   | 0.844                 |
| Arm specific tests:                            |                 |                |                             |                |                              |                              |                        |          |                        |                       |
| Hand use                                       | Right           | Left           | Right                       | Left           | Right                        | Left                         | pooling weak arms      |          | R- vs L-weak arms      |                       |
| NIHSS – arm motor /4 (0: normal)               | 0               | 0              | 2* <sup>2</sup><br>(1 - 2)  | 0              | 0                            | 1.5* <sup>2</sup><br>(1 - 2) | 21.5                   | 0.000    | 0.03                   | 0.856                 |
| Short Fugl Meyer arm function /12 (12: normal) | 12              | 12             | 9* <sup>2</sup><br>(9 - 11) | 12             | 12                           | 9* <sup>2</sup><br>(7 - 10)  | 21.0                   | 0.000    | 0.62                   | 0.430                 |
| Grip force /% (100% ≡ ≥100N)                   | 100<br>(99-100) | 99<br>(98-100) | 87* <sup>2</sup><br>(76-99) | 99<br>(82-100) | 96<br>(94-99)                | 90* <sup>2</sup><br>(74-94)  | 16.7                   | 0.000    | 0.04                   | 0.846                 |

† “weak” here refers to clinically-apparent impairment in hand strength and/or dexterity. Note that patients can have impaired dexterity while having normal grip force in the same hand. Cited values are median (interquartile range). All tests non-parametric (Kruskal-Wallis, rank sum or chi<sup>2</sup>-tests where appropriate). \*<sup>1</sup> p<0.01, all patients vs controls. \*<sup>2</sup> p<0.01 paretic-arm vs equivalent arm in controls (e.g. L arm in L-hand weak group vs. L arm in controls). Comparisons of paretic arms of R- vs.L-weak\*<sup>3</sup> were insignificant.

**Table S3: Subject characteristics (Non-motor experiment)**

|                                                |                 |                 |                               |                |                           |                                | <b>3 groups</b>        |          | <b>R vs L-weak</b>     |                       |
|------------------------------------------------|-----------------|-----------------|-------------------------------|----------------|---------------------------|--------------------------------|------------------------|----------|------------------------|-----------------------|
|                                                | <b>Controls</b> |                 | <b>R-hand weak†</b>           |                | <b>L-hand weak†</b>       |                                | <b>Chi<sup>2</sup></b> | <b>P</b> | <b>Chi<sup>2</sup></b> | <b>P*<sup>3</sup></b> |
| N                                              | 11              |                 | 13                            |                | 12                        |                                |                        |          |                        |                       |
| Age / yrs                                      | 63 (56 - 68)    |                 | 58 (50 - 64)                  |                | 63 (58 - 70)              |                                | 1.51                   | 0.471    | 1.64                   | 0.200                 |
| Males / %                                      | 46              |                 | 54                            |                | 75                        |                                | 2.23                   | 0.328    | 1.21                   | 0.271                 |
| Handedness (EHI)                               | 90 (83 - 100)   |                 | 90 (88 - 100)                 |                | 90 (80 - 100)             |                                | 0.15                   | 0.928    | 0.00                   | 0.951                 |
| NIHSS – overall /42                            | 0               |                 | 5 (4 - 6)                     |                | 5 (4 - 7) * <sup>1</sup>  |                                | 23.2                   | 0.000    | 0.00                   | 0.956                 |
| HADS – Depression /15                          | 2 (1 - 3)       |                 | 2 (2 - 3)                     |                | 2 (1 - 5)                 |                                | 1.31                   | 0.521    | 0.01                   | 0.911                 |
| HADS – Anxiety /15                             | 3 (2 - 3)       |                 | 2 (2 - 3)                     |                | 3 (1 - 4)                 |                                | 1.34                   | 0.511    | 0.11                   | 0.736                 |
| Lesion volume /cc.                             | 0               |                 | 3.9 (1.1 - 16)                |                | 14 (6 - 31)* <sup>1</sup> |                                | 24.1                   | 0.000    | 2.32                   | 0.128                 |
| White Matter Score /3                          | 1 (1 - 1)       |                 | 1 (1 - 1)                     |                | 1 (1 - 2)                 |                                | 3.23                   | 0.199    | 3.08                   | 0.079                 |
| Days from stroke onset                         | -               |                 | 6 (4 - 7)                     |                | 7 (5 - 8)                 |                                | -                      | -        | 0.44                   | 0.509                 |
| Arm specific tests:                            |                 |                 |                               |                |                           |                                |                        |          |                        |                       |
| Hand use                                       | Right           | Left            | Right                         | Left           | Right                     | Left                           | pooling weak arms      |          | R- vs L-weak arms      |                       |
| NIHSS – arm motor /4 (0: normal)               | 0               | 0               | 2* <sup>2</sup><br>(1 - 3)    | 0              | 0                         | 2* <sup>2</sup><br>(2 - 3)     | 24.0                   | 0.000    | 0.05                   | 0.816                 |
| Short Fugl Meyer arm function /12 (12: normal) | 12              | 12              | 8* <sup>2</sup><br>(6.8 - 10) | 12             | 12                        | 7.5* <sup>2</sup><br>(7 - 9.5) | 17.3                   | 0.000    | 0.40                   | 0.527                 |
| Grip force /% (100% ≡ ≥100N)                   | 100<br>(98-100) | 100<br>(97-100) | 92<br>(75-98)                 | 99<br>(92-100) | 97<br>(89-100)            | 83* <sup>2</sup><br>(72-95)    | 12.2                   | 0.002    | 0.50                   | 0.479                 |

† “weak” here refers to clinically-apparent impairment in hand strength and/or dexterity. Note that patients can have impaired dexterity while having normal grip force in the same hand. Cited values are median (interquartile range). All tests non-parametric (Kruskal-Wallis, rank sum or chi2-tests where appropriate). \*1 p<0.01, all patients vs controls. \*2 p<0.01 paretic-arm vs equivalent arm in controls (e.g. L arm in L-hand weak group vs. L arm in controls). Comparisons of paretic arms of R- vs.L-weak\*3 were insignificant.

**Table S4: Subject characteristics (Resting-state FMRI experiment)**

|                                                |                 |                 |                              |                 |                              |                             | <b>3 groups</b>   |          | <b>R vs L-weak</b> |            |
|------------------------------------------------|-----------------|-----------------|------------------------------|-----------------|------------------------------|-----------------------------|-------------------|----------|--------------------|------------|
|                                                | <b>Controls</b> |                 | <b>R-hand weak†</b>          |                 | <b>L-hand weak†</b>          |                             | <b>Chi^2</b>      | <b>P</b> | <b>Chi^2</b>       | <b>P*3</b> |
| N                                              | 23              |                 | 12                           |                 | 11                           |                             |                   |          |                    |            |
| Age / yrs                                      | 60 (50 - 62)    |                 | 61 (46 - 70)                 |                 | 64 (56 - 75)                 |                             | 3.18              | 0.204    | 1.03               | 0.309      |
| Males / %                                      | 57              |                 | 75                           |                 | 82                           |                             | 2.60              | 0.273    | 0.16               | 0.692      |
| Handedness (EHI)                               | 100 (90 - 100)  |                 | 90 (80 - 90)                 |                 | 100 (80 - 100)               |                             | 5.39              | 0.068    | 0.70               | 0.404      |
| NIHSS – overall /42                            | 0               |                 | 3 (2 - 6)                    |                 | 6 (4 - 9) * <sup>1</sup>     |                             | 39.6              | 0.000    | 3.13               | 0.077      |
| HADS – Depression /15                          | 2 (1 - 5)       |                 | 5 (1 - 8)                    |                 | 4 (2 - 8)                    |                             | 1.95              | 0.376    | 0.28               | 0.598      |
| HADS – Anxiety /15                             | 2 (1 - 5)       |                 | 6 (1 - 9)                    |                 | 4 (2 - 8)                    |                             | 1.70              | 0.427    | 0.25               | 0.621      |
| Lesion volume /cc.                             | 0               |                 | 2.8 (1.2 - 6.4)              |                 | 8.5 (3.6 - 31)* <sup>1</sup> |                             | 39.6              | 0.000    | 3.64               | 0.056      |
| White Matter Score /3                          | 1 (1 - 1)       |                 | 1 (0 - 1)                    |                 | 1 (1 - 2)                    |                             | 4.61              | 0.100    | 3.52               | 0.061      |
| Days from stroke onset                         | -               |                 | 7 (6 - 8)                    |                 | 7 (6 - 8)                    |                             | -                 | -        | 0.04               | 0.851      |
| Arm specific tests:                            |                 |                 |                              |                 |                              |                             |                   |          |                    |            |
| Hand use                                       | Right           | Left            | Right                        | Left            | Right                        | Left                        | pooling weak arms |          | R- vs L-weak arms  |            |
| NIHSS – arm motor /4 (0: normal)               | 0               | 0               | 1* <sup>2</sup><br>(1 - 2)   | 0               | 0                            | 2* <sup>2</sup><br>(2 - 3)  | 30.7              | 0.000    | 2.45               | 0.118      |
| Short Fugl Meyer arm function /12 (12: normal) | 12              | 12              | 11* <sup>2</sup><br>(9 - 12) | 12              | 12                           | 9* <sup>2</sup><br>(6 - 11) | 30.3              | 0.000    | 1.90               | 0.168      |
| Grip force /% (100% ≡ ≥100N)                   | 100<br>(98-100) | 100<br>(97-100) | 97* <sup>2</sup><br>(90-98)  | 100<br>(99-100) | 95<br>(76-100)               | 86* <sup>2</sup><br>(71-95) | 19.2              | 0.000    | 3.42               | 0.069      |

† “weak” here refers to clinically-apparent impairment in hand strength and/or dexterity. Note that patients can have impaired dexterity while having normal grip force in the same hand. Cited values are median (interquartile range). All tests non-parametric (Kruskal-Wallis, rank sum or chi2-tests where appropriate). \*1 p<0.01, all patients vs controls. \*2 p<0.01 paretic-arm vs equivalent arm in controls (e.g. L arm in L-hand weak group vs. L arm in controls). Comparisons of paretic arms of R- vs.L-weak\*3 were insignificant. Lesions in higher cortical regions (i.e. other than primary sensorimotor cortex): N = 8 (R-hand weak); 8 (L-hand weak). Lesions whose volume is ≥50% within corticospinal tract / M-1: N = 7 (R-hand weak); 4 (L-hand weak). N patients with lesions in attention-control regions and/or frontoparietal cortices but not CST/M1: 3. N patients with lesions where overlap of attention-control regions > overlap of CST/M1: 8.

**Table S5: Undistracted performance**

| Task                                                                         | Tracking (slow) |                   |                    | Precision      |                 |                 | Force           |                     |                    |
|------------------------------------------------------------------------------|-----------------|-------------------|--------------------|----------------|-----------------|-----------------|-----------------|---------------------|--------------------|
|                                                                              | Controls        | R-weak            | L-weak             | Controls       | R-weak          | L-weak          | Controls        | R-weak              | L-weak             |
| Subject group                                                                | 49              | 50                | 42                 | 10             | 11              | 14              | 59              | 61                  | 56                 |
| N                                                                            | 49              | 50                | 42                 | 10             | 11              | 14              | 59              | 61                  | 56                 |
| Age                                                                          | 56              | 57                | 63                 | 68             | 58              | 68              | 56              | 57                  | 64                 |
| Median difference:<br>Controls: R vs L<br>Patients: paretic vs<br>nonparetic | 5.5%<br>p<0.01  | 4.3%<br>p=0.015   | 11%<br>p<0.001     | 2.8%<br>p=0.11 | 9.8%<br>p=0.023 | 12%<br>p<0.01   | 0.00<br>p=0.11  | A*: 1.3%<br>P<0.001 | A: 5.4%<br>p<0.001 |
|                                                                              |                 |                   |                    |                |                 |                 |                 | B*: 18%<br>p<0.05   | B: 29%<br>p<0.001  |
| Correlation (r <sup>2</sup> )<br>R vs L**                                    | 0.52<br>p<0.001 | 0.76<br>p<0.001   | 0.71<br>p<0.001    | 0.09<br>p=0.41 | 0.58<br>p<0.01  | 0.82<br>p<0.001 | 0.69<br>p<0.001 | A: 0.23<br>p<0.001  | A: 0.41<br>p<0.001 |
| Group differences:<br>controls vs. patients<br>R hand use                    | -               | 19%<br>p<0.001    | 22%<br>p<0.001     | -              | 23%<br>P<0.01   | 28%<br>p<0.001  | -               | A: 4.0%<br>p<0.001  | A: 1.8%<br>P<0.001 |
|                                                                              |                 | B: 38%<br>p<0.001 | B: 3.6%<br>p<0.001 |                |                 |                 |                 |                     |                    |
| L hand use                                                                   | -               | 9.4%<br>p=0.014   | 31%<br>p<0.001     | -              | 4.9%<br>p=0.19  | 47%<br>p<0.001  | -               | A: 0.75%<br>p=0.054 | A: 8.4%<br>p<0.001 |
|                                                                              |                 | B: 19%<br>P<0.01  | B: 37%<br>p<0.001  |                |                 |                 |                 |                     |                    |

All statistical tests are non-parametric: difference: sign test; correlation: Spearman's rank; group-differences: rank sum.

\* A: all patients; B: patients with grip force <75% in either hand (n=8, 16 for R- and L-weak, respectively).

\*\* Task-differences in R-L correlation coefficients were seen for Tracking vs Force (Z=3.9; p<0.001) and Precision vs Force (Z=2.5, p=0.01).

Differences in y-intercept for equivalent linear regressions were seen for Tracking vs Force and Precision vs Force (t>5; p<0.001).

Paretic-hand Force (or controls' left hand) correlated with Nonparetic (or controls' right-) hand Tracking, or Precision: r≥0.3; p≤0.01.

**Table S6: Effect of distractors**

| <b>A: ANOVAs assessing effect of distractors on accuracy, and interaction with hand-used, task-speed, and group</b>   |                                                                                                                                                                                                                                                                                                                                                                                                                                                                                                    |        |                  |                                                                                                                                                                                                                                                                                        |                |        |
|-----------------------------------------------------------------------------------------------------------------------|----------------------------------------------------------------------------------------------------------------------------------------------------------------------------------------------------------------------------------------------------------------------------------------------------------------------------------------------------------------------------------------------------------------------------------------------------------------------------------------------------|--------|------------------|----------------------------------------------------------------------------------------------------------------------------------------------------------------------------------------------------------------------------------------------------------------------------------------|----------------|--------|
| <b>Task</b>                                                                                                           | <b>Tracking</b>                                                                                                                                                                                                                                                                                                                                                                                                                                                                                    |        |                  | <b>Precision</b>                                                                                                                                                                                                                                                                       |                |        |
| Raw-accuracy*<br>- distractors 0,1,3<br>(tracking)<br>- distractors 0,3<br>(precision)                                | Factors: Distractors, Hand-use, Speed, Group<br>Distractors: F(2,276) = 427, p<0.001<br>- linear contrast: F(1,138) = 660, p<0.001<br>Group x Distractors: F(4,276) = 7.5, p<0.001<br>- linear contrast: F(2,138) = 11.5, p<0.001<br>Group x Distractors x Hand-Use: F(4,276)=2.70, p=0.024, due to Distraction greater for <i>Nonparetic</i> -hand in R-weak and L-weak patients (see Fig. 2A)<br>Group x Distractor x Speed: F(4,276)=1.16, p=0.30,<br>4-way interaction: F(4,828)=2.47, p=0.056 |        |                  | Factors: Distractors, Hand-use, Group<br>Distractors: F(2,34) = 46.6, p<0.001<br>Group x Distractors: F(2,34)=1.0, p=0.38<br>Group x Distractors x Hand-Use: F(2,34)=2.9, p=0.071, due to Distraction greater for <i>Nonparetic</i> -hand in R-weak and L-weak patients (see Fig. 2A). |                |        |
| Normalized interference<br>= $\frac{(\text{Distractor 0} - 3)}{\text{Distractor 0}}$                                  | Factors: Hand-use, Speed, Group<br>Group: F(2,138) = 34.6, p<0.001<br>Group x Hand-Use (F(2,138)=1.34; p=0.26),<br>Group x Speed (F(2,138)=0.69; p=0.50),<br>3-way interaction (F(2,138)=1.71; p=0.18)                                                                                                                                                                                                                                                                                             |        |                  | Factors: Hand-use, Group<br>Group: F(1,35) = 6.6, p=0.013<br>Group x Hand-Use: F(1,35)=0.7, p=0.41                                                                                                                                                                                     |                |        |
| Normalized interference:<br>Task comparison                                                                           | Factors: Hand-Use, Group, Task (Tracking vs Precision)<br>Task: F(1,172)=0.58, p=0.448; Hand-Use: F(1,172)=0, p=1.0;<br>Task x Hand-Use: F(1,172)=0.09, p=0.76; Task x Group: F(2,172)=0.12, p=0.88;<br>Task x Group x Hand-Use: F(2,172)=1.07, p=0.347                                                                                                                                                                                                                                            |        |                  |                                                                                                                                                                                                                                                                                        |                |        |
| Significance ascertained by non-parametric ANOVA (permutation test). *Only Distractor effects reported.               |                                                                                                                                                                                                                                                                                                                                                                                                                                                                                                    |        |                  |                                                                                                                                                                                                                                                                                        |                |        |
| <b>B: Correlations of interference with undistracted performance: bilateral (1 or 2) or unilateral (3) components</b> |                                                                                                                                                                                                                                                                                                                                                                                                                                                                                                    |        |                  |                                                                                                                                                                                                                                                                                        |                |        |
| <b>Task</b>                                                                                                           | <b>Tracking (slow)</b>                                                                                                                                                                                                                                                                                                                                                                                                                                                                             |        | <b>Precision</b> |                                                                                                                                                                                                                                                                                        | <b>Force†</b>  |        |
|                                                                                                                       | r <sup>2</sup>                                                                                                                                                                                                                                                                                                                                                                                                                                                                                     | p      | r <sup>2</sup>   | P                                                                                                                                                                                                                                                                                      | r <sup>2</sup> | P      |
| (1a) Nonparetic-hand interference vs.                                                                                 | 0.39                                                                                                                                                                                                                                                                                                                                                                                                                                                                                               | <0.001 | 0.26             | <0.01                                                                                                                                                                                                                                                                                  | A: 0.21        | <0.001 |

|                                                                                                              |        |        |       |        |           |        |
|--------------------------------------------------------------------------------------------------------------|--------|--------|-------|--------|-----------|--------|
| Paretic-hand performance                                                                                     |        |        |       |        | B: 0.17   | <0.001 |
| (1b) Nonparetic-hand interference vs. Nonparetic-hand performance                                            | 0.36   | <0.001 | 0.41  | <0.001 | A: 0.17   | <0.001 |
|                                                                                                              |        |        |       |        | B: 0.14   | <0.001 |
| (1a) partialling out lesion volume, Mood                                                                     | 0.26   | <0.001 | 0.17  | 0.013  | A: 0.09   | <0.001 |
|                                                                                                              |        |        |       |        | B: 0.08   | <0.001 |
| (1b) partialling out lesion volume, Mood                                                                     | 0.21   | <0.001 | 0.33  | <0.001 | A: 0.09   | <0.001 |
|                                                                                                              |        |        |       |        | B: 0.08   | <0.001 |
| (2) Nonparetic -hand interference vs. [Nonparetic - Paretic performance] partialling out lesion volume, mood | 0.04** | 0.013  | 0.01* | 0.67   | A: 0.01** | 0.156  |
|                                                                                                              |        |        |       |        | B: 0.02** | 0.099  |

All correlations use Spearman's test. † Correlation of Force with Tracking or Precision interference. A: average; B: best of 4 trials.

\*\* Comparison of r between Nonparetic / interference correlation (1) vs. [Nonparetic-Paretic] / interference correlation (2) :  $p < 0.001$ , \* $< 0.01$

All comparisons of r's between (1a) vs. (1b) are non-significant ( $p > 0.1$ ).

Interference/performance r's decreased in order: Tracking > Precision > Force (Tracking > Force:  $Z = 1.8$ ;  $p = 0.074$ ; others contrasts: n.s.).

All comparisons of r between groups (Controls, patients) are non-significant ( $p > 0.05$ ), except L-weak vs R-weak for Tracking ( $r = -0.12$  versus  $-0.69$ ;  $p < 0.01$ ). This may be accounted for by the observation (see main report) that poorer performance is associated with higher interference variability, given that L-weak were worse at Tracking than R-weak in their paretic hand (difference: 18%;  $p < 0.01$ ; corrected for lesion volume).

Fatigue and pain self-rating scores showed no correlations ( $p > 0.1$ ) with conflict or performance in either hand ( $n = 46$ ).

### **C: Correlations of non-motor (working-memory) interference with undistracted motor performance**

| Task                                 | Tracking (slow) |        | Precision      |   | Force          |        |
|--------------------------------------|-----------------|--------|----------------|---|----------------|--------|
|                                      | r <sup>2</sup>  | P      | r <sup>2</sup> | P | r <sup>2</sup> | P      |
| (1a) Paretic-hand performance        | 0.54            | <0.001 | -              | - | 0.34           | <0.001 |
| (1b) Nonparetic-hand performance     | 0.48            | <0.001 | -              | - | 0.24           | <0.01  |
| (1a) corrected for lesion size, mood | 0.37            | <0.001 | -              | - | 0.13           | 0.040  |
| (1b) corrected for lesion size, mood | 0.32            | <0.001 | -              | - | 0.14           | 0.032  |

N.B. Non-motor r values are all numerically greater (albeit not significantly different;  $p > 0.1$ ) than the equivalent correlations that use interference values from motor-Tracking.

**Figure S7: Voxelwise permutation rank-order (Brunner-Munzel) test**

Values of the two motor, and one interference, measures were each tested for associations with lesion locations using the Brunner-Munzel rank-order test. Voxels surpassing significant permutation thresholds ( $p < 0.05$  FWE) for each association are shown below. Associations with Nonparetic hand Tracking and Nonparetic – Paretic hand Force showed no significant voxels. Lesions from left hemisphere are flipped onto the right hemisphere to increase power.

■ Nonparetic hand Force (bilateral component):  $Z > 3.8$

■ Interference on Tracking:  $Z > 3.6$

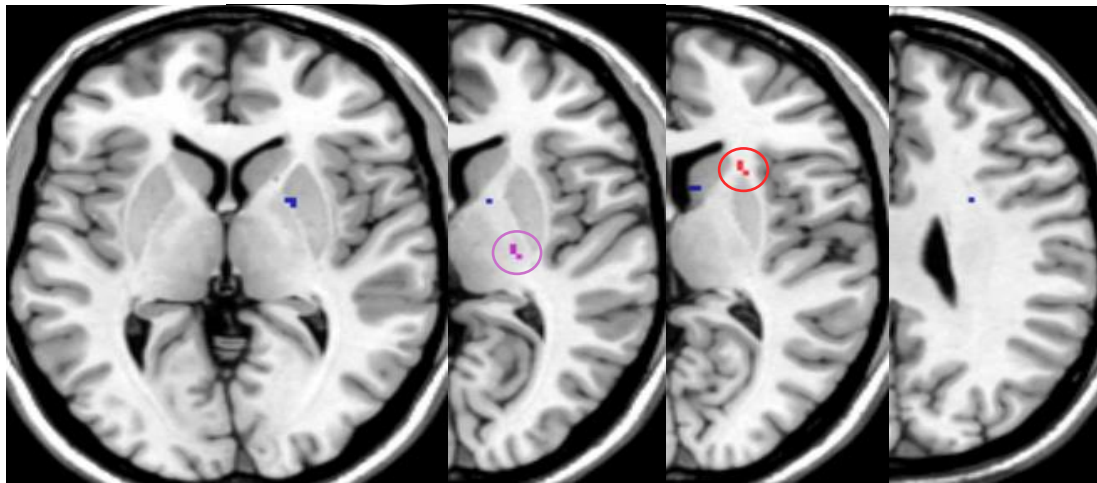

■ [Nonparetic – Paretic] hand Tracking (unilateral component):  $Z > 3.9$



**Table S8: Correlations of motor and attentional performance with ROI lesion overlap**

| <b>A: Corticospinal tract – primary motor cortex</b>     |                |              |                         |              |
|----------------------------------------------------------|----------------|--------------|-------------------------|--------------|
| Task: Hand used                                          | Uncorrected    |              | Corrected (lesion vol.) |              |
|                                                          | r <sup>2</sup> | P            | r <sup>2</sup>          | P            |
| Tracking: Nonparetic-hand                                | 0.014          | 0.257        | 0.004                   | 0.577        |
| Tracking: Hand-difference                                | <b>0.276</b>   | <b>0.000</b> | <b>0.245</b>            | <b>0.000</b> |
| Grip: Nonparetic-hand                                    | 0.000          | 0.837        | 0.020                   | 0.186        |
| Grip: Hand-difference                                    | <b>0.107</b>   | <b>0.001</b> | <b>0.097</b>            | <b>0.003</b> |
| Tracking Interference: Nonparetic-hand                   | 0.021          | 0.163        | 0.003                   | 0.605        |
| <b>B: Attention-control (cingulo-opercular) network*</b> |                |              |                         |              |
| Tracking: Nonparetic-hand                                | <b>0.280</b>   | <b>0.000</b> | <b>0.258</b>            | <b>0.001</b> |
| Tracking: Hand-difference                                | 0.087          | 0.004        | 0.047                   | 0.038        |
| Grip: Nonparetic-hand                                    | <b>0.190</b>   | <b>0.000</b> | <b>0.096</b>            | <b>0.003</b> |
| Grip: Hand-difference                                    | 0.021          | 0.173        | 0.011                   | 0.332        |
| Tracking Interference: Nonparetic-hand                   | <b>0.271</b>   | <b>0.000</b> | <b>0.187</b>            | <b>0.000</b> |
| <b>C: Left fronto-parietal-temporal network</b>          |                |              |                         |              |
| Tracking: Nonparetic-hand                                | 0.008          | 0.536        | 0.002                   | 0.791        |
| Tracking: Hand-difference                                | 0.139          | 0.008        | 0.067                   | 0.072        |
| Grip: Nonparetic-hand                                    | 0.030          | 0.228        | 0.012                   | 0.445        |
| Grip: Hand-difference                                    | 0.033          | 0.207        | 0.017                   | 0.365        |
| Tracking Interference: Nonparetic-hand                   | 0.016          | 0.382        | 0.002                   | 0.790        |
| <b>D: Right fronto-parietal network</b>                  |                |              |                         |              |
| Tracking: Nonparetic-hand                                | 0.000          | 0.928        | 0.020                   | 0.378        |
| Tracking: Hand-difference                                | 0.013          | 0.481        | 0.000                   | 0.861        |
| Grip: Nonparetic-hand                                    | 0.024          | 0.326        | 0.000                   | 0.899        |
| Grip: Hand-difference                                    | 0.003          | 0.744        | 0.003                   | 0.751        |
| Tracking Interference: Nonparetic-hand                   | 0.167          | 0.007        | 0.066                   | 0.106        |
| <b>E: Callosal fibres</b>                                |                |              |                         |              |
| Tracking: Nonparetic-hand                                | 0.021          | 0.165        | 0.002                   | 0.669        |
| Tracking: Hand-difference                                | 0.069          | 0.011        | 0.034                   | 0.078        |
| Grip: Nonparetic-hand                                    | 0.012          | 0.293        | 0.006                   | 0.463        |
| Grip: Hand-difference                                    | 0.013          | 0.270        | 0.006                   | 0.483        |
| Tracking Interference: Nonparetic-hand                   | 0.050          | 0.032        | 0.006                   | 0.480        |

\*Comparisons of r between R vs L-weak patients for all performance measures was non-significant except Interference, corrected, for which R-weak (L-sided lesions) correlation was greater than L-weak (R-sided lesions) (Z=2.39, p=0.017).

**Table S9. Cross-correlations of Motor Performance with Resting-state network integrity**

| r <sup>2</sup> value (+/- indicates sign of r) | <b>Pooling Controls and Patients</b><br>Corrected for age |                             |                    |
|------------------------------------------------|-----------------------------------------------------------|-----------------------------|--------------------|
|                                                | Tracking<br>(Paretic or R arm )                           | Force<br>(Paretic or R arm) | Force Difference   |
| <b>Resting-state network integrity</b>         |                                                           |                             |                    |
| Primary sensorimotor                           | (+) 0.121†                                                | (+) <b>0.199*</b>           | (-) <b>0.317**</b> |
| Cingulo-opercular                              | (+) <b>0.162*</b>                                         | (+) 0.121†                  | (-) 0.040          |
| R dorsal frontoparietal ('visuo-spatial')      | (+) 0.081†                                                | (+) 0.067                   | (-) 0.112†         |
| Default-mode                                   | (+) 0.128†                                                | (+) 0.121†                  | (-) 0.101†         |
| Visual (medial & lateral)                      | (+) 0.006                                                 | (+) 0.000                   | (-) 0.009          |
| L fronto-temporal-parietal ('praxis')          | (+) 0.024                                                 | (+) 0.108†                  | (-) 0.051          |
| Auditory                                       | (+) 0.020                                                 | (+) 0.000                   | (-) 0.047          |
| Cerebellum-brainstem                           | (+) 0.012                                                 | (+) 0.023                   | (-) 0.048          |

| r <sup>2</sup> value (+/- indicates sign of r) | <b>Patients only</b><br>Corrected for lesion volume, age |                    |                    |
|------------------------------------------------|----------------------------------------------------------|--------------------|--------------------|
|                                                | Tracking<br>(Paretic)                                    | Force<br>(Paretic) | Force Difference   |
| <b>Resting-state network integrity</b>         |                                                          |                    |                    |
| Primary sensorimotor                           | (+) <b>0.331*</b>                                        | (+) <b>0.430**</b> | (-) <b>0.536**</b> |
| Cingulo-opercular                              | (+) 0.228†                                               | (+) 0.188†         | (-) 0.061          |
| R dorsal frontoparietal ('visuo-spatial')      | (+) 0.046                                                | (+) 0.002          | (-) 0.009          |
| Default-mode                                   | (+) 0.026                                                | (+) 0.090          | (-) 0.082          |
| Visual (medial & lateral)                      | (+) 0.003                                                | (+) 0.000          | (+) 0.001          |
| L fronto-temporal-parietal ('praxis')          | (+) 0.023                                                | (+) 0.120          | (-) 0.009          |
| Auditory                                       | (+) 0.022                                                | (-) 0.000          | (-) 0.061          |
| Cerebellum-brainstem                           | (-) 0.005                                                | (-) 0.034          | (+) 0.015          |

\*\* p<0.01. \* p<0.05, Bonferroni corrected. † p<0.05 uncorrected for multiple comparisons.

**Table S10. Cross-correlation of Anatomical ROI with Resting-state network integrity**

| r <sup>2</sup> value (+/- indicates sign of r) | Anatomical ROI lesion overlap |                    |                            |                   |            |
|------------------------------------------------|-------------------------------|--------------------|----------------------------|-------------------|------------|
|                                                | CST-M1                        | Attention-control  | L fronto-parietal-temporal | R fronto-parietal | Callosal   |
| <b>Resting-state network integrity</b>         |                               |                    |                            |                   |            |
| Primary sensorimotor                           | (-) <b>0.510</b> **           | (-) 0.121          | (-) 0.014                  | (-) 0.016         | (-) 0.252† |
| Cingulo-opercular                              | (-) 0.166                     | (-) <b>0.388</b> * | (-) 0.119                  | (-) 0.107         | (-) 0.099  |
| R dorsal frontoparietal ('visuo-spatial')      | (-) 0.064                     | (-) 0.033          | (-) 0.000                  | (-) 0.000         | (-) 0.043  |
| Default-mode                                   | (-) 0.000                     | (-) 0.096          | (-) 0.003                  | (-) 0.000         | (-) 0.054  |
| Visual (medial & lateral)                      | (+) 0.006                     | (-) 0.018          | (-) 0.016                  | (-) 0.009         | (+) 0.041  |
| L fronto-temporal-parietal ('praxis')          | (-) 0.022                     | (-) 0.002          | (-) 0.005                  | (-) 0.004         | (-) 0.096  |
| Auditory                                       | (-) 0.060                     | (-) 0.012          | (-) 0.008                  | (-) 0.000         | (-) 0.056  |
| Cerebellum-brainstem                           | (+) 0.107                     | (-) 0.032          | (-) 0.008                  | (-) 0.008         | (+) 0.001  |

\*\* p<0.01. \* p<0.05, Bonferroni corrected. † p<0.05 uncorrected for multiple comparisons.

**Table S11: Patient List (for lesion-anatomy and fMRI studies)**

| Age                                                          | Sex | Lesion location                                                   | Lesion vol (cc) | Handedness (EHI /100) | Short Fugl-Meyer Upper Limb (/12) | NIHSS | Test interval from stroke onset (days) |
|--------------------------------------------------------------|-----|-------------------------------------------------------------------|-----------------|-----------------------|-----------------------------------|-------|----------------------------------------|
| <b>Lesion-anatomy study (Tracking and Force experiments)</b> |     |                                                                   |                 |                       |                                   |       |                                        |
| 45                                                           | M   | R corona radiata (mid)                                            | 7.58            | 70                    | 7                                 | 5     | 7                                      |
| 53                                                           | M   | R caudate, striatocapsular, thalamus, corona radiata (mid)        | 26.38           | 100                   | 9                                 | 6     | 5                                      |
| 69                                                           | M   | R posterior thalamus, capsule, corona radiata (mid, posterior)    | 9.03            | 100                   | 10                                | 4     | 9                                      |
| 66                                                           | F   | R striatocapsular, thalamus                                       | 1.91            | 80                    | 9                                 | 3     | 6                                      |
| 79                                                           | F   | R precentral gyrus                                                | 2.66            | 100                   | 10                                | 2     | 4                                      |
| 66                                                           | M   | R inferior frontal                                                | 6.22            | 70                    | 10                                | 6     | 8                                      |
| 90                                                           | M   | R parietal                                                        | 14.94           | 100                   | 11                                | 3     | 9                                      |
| 55                                                           | F   | R medial, superior frontal                                        | 8.62            | 100                   | 7                                 | 4     | 4                                      |
| 47                                                           | F   | R hemipons                                                        | 1.16            | 100                   | 6                                 | 4     | 5                                      |
| 55                                                           | M   | R corona radiata (mid), thalamus, caudate, capsule                | 28.01           | 80                    | 10                                | 6     | 7                                      |
| 76                                                           | M   | R frontoparietal                                                  | 39.50           | 90                    | 8                                 | 7     | 13                                     |
| 70                                                           | M   | R capsule, prefrontal                                             | 4.30            | 100                   | 12                                | 4     | 2                                      |
| 66                                                           | M   | R corona radiata (posterior)                                      | 2.94            | 100                   | 9                                 | 3     | 1                                      |
| 75                                                           | M   | R frontal operculum                                               | 3.38            | 100                   | 7                                 | 2     | 2                                      |
| 75                                                           | F   | R corona radiata (posterior, mid)                                 | 5.72            | 100                   | 8                                 | 4     | 10                                     |
| 68                                                           | M   | R corona radiata (anterior, mid), striatocapsular, frontoparietal | 20.09           | 80                    | 7                                 | 4     | 3                                      |
| 65                                                           | M   | R insula, striatocapsular                                         | 12.94           | 100                   | 6                                 | 5     | 2                                      |
| 49                                                           | M   | R corona radiata (whole), striatocapsular                         | 42.60           | 100                   | 9                                 | 5     | 7                                      |
| 60                                                           | F   | R corona radiata (mid), striatocapsular                           | 11.72           | 100                   | 9                                 | 5     | 8                                      |
| 29                                                           | M   | R thalamus                                                        | 1.38            | 100                   | 7                                 | 4     | 8                                      |
| 67                                                           | M   | R parietal                                                        | 4.39            | 100                   | 8                                 | 3     | 2                                      |
| 61                                                           | M   | R corona radiata (mid)                                            | 4.21            | 100                   | 12                                | 3     | 9                                      |
| 64                                                           | F   | R frontoparietal                                                  | 25.00           | 100                   | 12                                | 4     | 5                                      |
| 58                                                           | M   | R thalamus, capsule                                               | 10.71           | 100                   | 7                                 | 8     | 3                                      |
| 82                                                           | M   | R prefrontal, striatocapsular                                     | 31.21           | 80                    | 5                                 | 7     | 6                                      |
| 70                                                           | F   | R striatocapsular                                                 | 20.43           | 100                   | 6                                 | 4     | 12                                     |
| 30                                                           | M   | R corona radiata (mid, anterior)                                  | 9.15            | 100                   | 12                                | 3     | 4                                      |
| 85                                                           | M   | R prefrontal, caudate                                             | 3.94            | 100                   | 8                                 | 5     | 6                                      |
| 21                                                           | M   | R parietal                                                        | 3.82            | 100                   | 9                                 | 3     | 2                                      |
| 55                                                           | F   | R corona radiata (mid)                                            | 2.49            | 70                    | 8                                 | 4     | 8                                      |
| 75                                                           | M   | R thalamus, hippocampus, cerebellum                               | 5.61            | 100                   | 7                                 | 4     | 8                                      |
| 63                                                           | F   | R frontoparietal                                                  | 14.68           | 100                   | 8                                 | 4     | 9                                      |
| 72                                                           | M   | R hemipons, midbrain                                              | 4.70            | 100                   | 11                                | 3     | 5                                      |
| 65                                                           | M   | R frontoparietal, striatocapsular                                 | 29.99           | 100                   | 8                                 | 6     | 8                                      |

|    |   |                                                                      |       |     |    |    |    |
|----|---|----------------------------------------------------------------------|-------|-----|----|----|----|
| 55 | M | R hemipons                                                           | 0.65  | 90  | 9  | 4  | 8  |
| 58 | M | R frontoparietal                                                     | 46.59 | 80  | 7  | 7  | 6  |
| 64 | M | R striatocapsular, insula, corona radiata (whole)                    | 37.94 | 80  | 10 | 3  | 5  |
| 59 | F | R pulvinar, parietal                                                 | 2.44  | 90  | 12 | 2  | 11 |
| 55 | M | R hemipons                                                           | 3.23  | 100 | 9  | 6  | 10 |
| 57 | M | R cingulate, caudate, striatocapsular                                | 15.22 | 80  | 5  | 10 | 8  |
| 85 | F | R frontoparietal                                                     | 12.82 | 100 | 7  | 5  | 1  |
| 51 | F | R corona radiata (mid, posterior)                                    | 5.79  | 100 | 8  | 5  | 2  |
| 61 | M | L striatocapsular, corona radiata (mid)                              | 5.54  | 100 | 8  | 5  | 6  |
| 70 | M | L striatocapsular, parietal                                          | 6.94  | 70  | 11 | 4  | 4  |
| 60 | M | L prefrontal                                                         | 13.00 | 100 | 12 | 5  | 8  |
| 65 | M | L capsule, thalamus, hippocampal                                     | 11.03 | 100 | 12 | 6  | 8  |
| 65 | M | L thalamus                                                           | 2.94  | 100 | 6  | 3  | 10 |
| 56 | M | L hemipons                                                           | 5.32  | 100 | 11 | 4  | 3  |
| 29 | M | L frontoparietal, operculum, striatocapsular                         | 26.62 | 100 | 12 | 3  | 4  |
| 61 | F | L parietal, corona radiata (mid)                                     | 2.23  | 100 | 6  | 4  | 5  |
| 40 | M | L corona radiata (posterior), thalamus, hippocampus                  | 2.72  | 95  | 12 | 5  | 5  |
| 76 | F | L corona radiata (anterior), superior prefrontal, anterior cingulate | 43.53 | 100 | 12 | 4  | 4  |
| 69 | F | L thalamus                                                           | 3.42  | 90  | 12 | 4  | 4  |
| 58 | M | L corona radiata (mid), striatum                                     | 2.10  | 100 | 7  | 4  | 4  |
| 51 | F | L insula, striatocapsular, corona radiata (posterior, mid), parietal | 56.90 | 100 | 8  | 6  | 12 |
| 38 | M | L hemipons, cerebellar                                               | 0.66  | 70  | 12 | 4  | 3  |
| 57 | M | L corona radiata (mid, anterior)                                     | 2.96  | 100 | 8  | 4  | 5  |
| 65 | M | L thalamus                                                           | 1.98  | 100 | 11 | 5  | 7  |
| 75 | M | L striatocapsular, corona radiata (mid)                              | 14.68 | 90  | 7  | 6  | 7  |
| 77 | M | L hemipons                                                           | 1.24  | 100 | 8  | 3  | 5  |
| 39 | M | L corona radiata (mid, anterior), prefrontal                         | 7.39  | 100 | 9  | 3  | 2  |
| 42 | M | L corona radiata (mid), striatum                                     | 2.02  | 80  | 8  | 6  | 6  |
| 80 | F | L capsule                                                            | 5.03  | 100 | 8  | 5  | 4  |
| 47 | F | L thalamus                                                           | 1.12  | 100 | 5  | 5  | 8  |
| 63 | M | L thalamus, capsule                                                  | 3.94  | 90  | 6  | 5  | 8  |
| 40 | M | L striatum                                                           | 3.84  | 100 | 12 | 4  | 11 |
| 74 | M | L thalamus, occipital                                                | 2.70  | 80  | 9  | 6  | 9  |
| 59 | F | L hippocampus, occipital                                             | 2.16  | 70  | 12 | 3  | 7  |
| 58 | F | L frontoparietal                                                     | 2.62  | 100 | 11 | 3  | 7  |
| 42 | F | L corona radiata (anterior), cingulate, prefrontal                   | 20.56 | 100 | 6  | 7  | 14 |
| 63 | M | L insula                                                             | 0.96  | 90  | 12 | 5  | 2  |
| 59 | M | L frontoparietal                                                     | 44.12 | 100 | 9  | 6  | 7  |
| 46 | M | L corona radiata (whole), frontoparietal                             | 93.16 | 100 | 7  | 7  | 4  |
| 36 | F | L thalamus, hemipons                                                 | 7.97  | 90  | 8  | 6  | 3  |

|                             |   |                                                           |        |     |    |    |    |
|-----------------------------|---|-----------------------------------------------------------|--------|-----|----|----|----|
| 66                          | F | L striatocapsular, corona radiata (whole), frontoparietal | 58.17  | 80  | 7  | 7  | 5  |
| 40                          | M | L prefrontal, striatum                                    | 3.29   | 90  | 9  | 6  | 2  |
| 69                          | M | L striatum, corona radiata (posterior)                    | 7.67   | 100 | 10 | 2  | 7  |
| 44                          | M | L corona radiata (posterior), thalamus                    | 5.58   | 100 | 12 | 2  | 4  |
| 36                          | F | L striatocapsular, corona radiata (mid, posterior)        | 42.26  | 100 | 5  | 8  | 6  |
| 56                          | M | L temporal                                                | 9.62   | 90  | 11 | 1  | 7  |
| 86                          | F | L parietal                                                | 0.89   | 100 | 8  | 4  | 2  |
| 44                          | F | L hemipons, medulla                                       | 8.29   | 100 | 12 | 3  | 3  |
| 49                          | M | L corona radiata (mid, posterior), parietal               | 39.29  | 90  | 10 | 6  | 3  |
| 57                          | M | L thalamus, capsule, prefrontal                           | 6.55   | 80  | 9  | 3  | 2  |
| 53                          | M | L thalamus                                                | 5.58   | 70  | 10 | 5  | 4  |
| 40                          | M | L insula                                                  | 1.97   | 90  | 11 | 2  | 7  |
| 57                          | F | L frontoparietal                                          | 6.94   | 90  | 10 | 2  | 2  |
| 53                          | M | L thalamus                                                | 0.84   | 100 | 10 | 4  | 9  |
| 65                          | M | L precentral, occipital                                   | 15.45  | 100 | 12 | 4  | 1  |
| 50                          | F | L cerebellum, hemipons                                    | 22.00  | 80  | 7  | 7  | 12 |
| 52                          | F | L prefrontal                                              | 6.99   | 80  | 8  | 6  | 8  |
| 64                          | M | L striatocapsular, thalamus                               | 15.97  | 100 | 8  | 7  | 7  |
| <b>Functional MRI study</b> |   |                                                           |        |     |    |    |    |
| 64                          | M | R corona radiata (mid)                                    | 3.59   | 60  | 12 | 2  | 5  |
| 64                          | M | R capsule, thalamus                                       | 1.27   | 80  | 11 | 3  | 7  |
| 67                          | M | R capsule, thalamus, temporal                             | 5.97   | 90  | 11 | 2  | 6  |
| 53                          | M | R corona radiata (anterior)                               | 1.45   | 100 | 7  | 6  | 7  |
| 26                          | M | R cerebral peduncle                                       | 0.96   | 90  | 11 | 3  | 7  |
| 71                          | F | R corona radiata (mid)                                    | 1.22   | 100 | 10 | 6  | 6  |
| 40                          | M | R capsule, prefrontal                                     | 2.10   | 100 | 11 | 2  | 8  |
| 53                          | M | R capsule, corona radiata (mid)                           | 1.70   | 80  | 9  | 6  | 7  |
| 45                          | M | R prefrontal                                              | 14.10  | 90  | 3  | 8  | 10 |
| 65                          | M | R corona radiata (anterior), prefrontal                   | 16.47  | 80  | 9  | 8  | 5  |
| 73                          | F | R hemipons, cerebellum, hippocampus                       | 6.81   | 90  | 12 | 2  | 11 |
| 61                          | M | R hemipons, medulla, cerebellum                           | 22.00  | 90  | 11 | 3  | 8  |
| 79                          | M | L temporoparietal, insula                                 | 109.54 | 60  | 2  | 13 | 9  |
| 62                          | M | L striatocapsular, thalamus, midbrain, hemipons           | 34.21  | 100 | 5  | 12 | 12 |
| 76                          | M | L frontoparietal                                          | 13.57  | 60  | 8  | 9  | 6  |
| 45                          | M | L capsule                                                 | 1.25   | 100 | 4  | 3  | 5  |
| 82                          | M | L striatocapsular, thalamus                               | 6.62   | 90  | 11 | 4  | 7  |
| 60                          | F | L striatocapsular, temporal                               | 13.50  | 90  | 2  | 8  | 5  |
| 73                          | M | L corona radiata (mid)                                    | 0.82   | 100 | 12 | 2  | 8  |
| 59                          | M | L capsule, corona radiata (mid, posterior)                | 17.88  | 100 | 8  | 3  | 7  |
| 47                          | F | L capsule                                                 | 1.10   | 80  | 12 | 1  | 6  |

|    |   |                                             |       |     |    |   |   |
|----|---|---------------------------------------------|-------|-----|----|---|---|
| 55 | M | L striatal, corona radiata (mid),<br>insula | 14.16 | 100 | 11 | 7 | 8 |
| 77 | F | L corona radiata (mid)                      | 2.56  | 80  | 10 | 4 | 8 |

## Figure S12: Lesion atlas (unflipped)

### Lesion-anatomy study

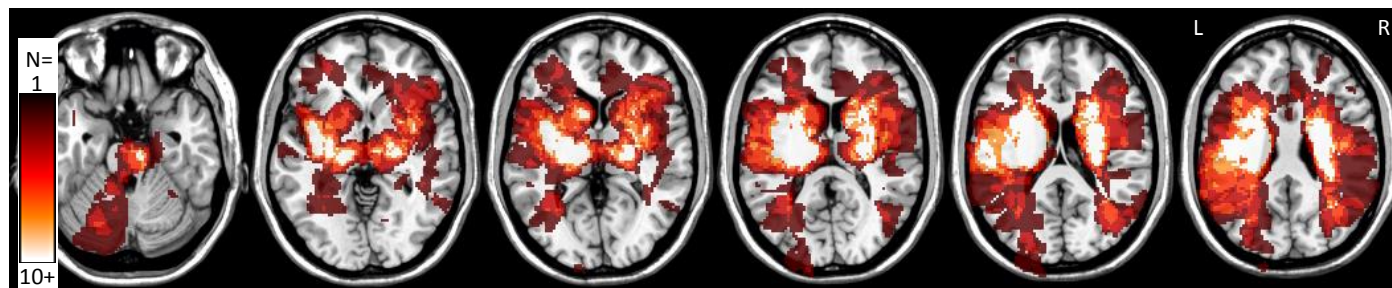

### Functional MRI study

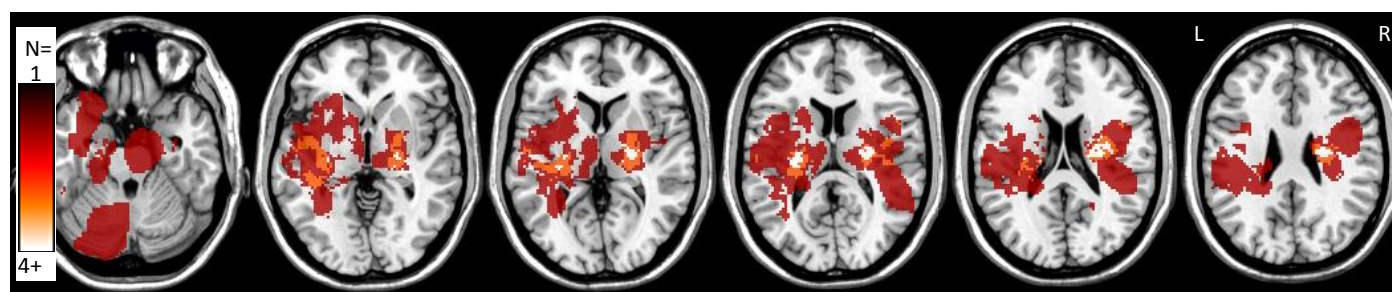

Supplement: pnas.1715617115.sapp.pdf [file pnas.1715617115.sapp.pdf]
